# Supplementary material for: Clostridium butyricum, a butyrate-producing potential probiotic, alleviates experimental colitis through epidermal growth factor receptor activation
Source: Royal Society of Chemistry journal article supplement (doi:10.1039/d2fo00478j), 2022-01-01
Supplement: d2fo00478j1.pdf [file d2fo00478j1.pdf]

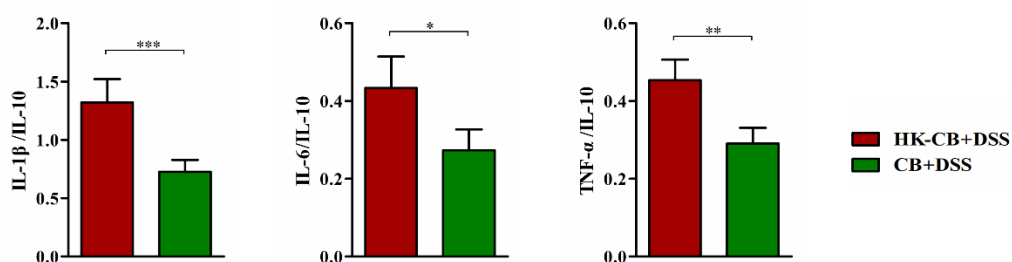

**Supplemental Fig. 1 Dietary feeding of CB decreased the ratio of pro-inflammatory/anti-inflammatory cytokines.**

The cytokines content in mice colon were determined and the ratio of pro-inflammatory/anti-inflammatory cytokines was accessed in mice suffered DSS administration.
