# Supplementary material for: Clostridium butyricum, a butyrate-producing potential probiotic, alleviates experimental colitis through epidermal growth factor receptor activation
Source: Royal Society of Chemistry journal article supplement (doi:10.1039/d2fo00478j), 2022-01-01
Supplement: d2fo00478j2.pdf [file d2fo00478j2.pdf]

**Supplemental table 1 DAI scoring system**

| Weight loss | Stool form | fecal occult blood/ hematochezia | Score |
|-------------|------------|----------------------------------|-------|
| None        | Normal     | Normal                           | 0     |
| 1~5%        | Shapeless  | fecal occult blood               | 1     |
| 6~10%       |            |                                  | 2     |
| 11~15%      | Loose      | gross bloody stool               | 3     |
| >15%        |            |                                  | 4     |

Scores were assessed for each category and divided by three to obtain the DAI.
