# Supplementary material for: Clostridium butyricum, a butyrate-producing potential probiotic, alleviates experimental colitis through epidermal growth factor receptor activation
Source: Royal Society of Chemistry journal article supplement (doi:10.1039/d2fo00478j), 2022-01-01
Supplement: d2fo00478j3.pdf [file d2fo00478j3.pdf]

**Supplemental table 2 Criteria of the histological evaluation**

| Pathological features | Criteria                              | Score |
|-----------------------|---------------------------------------|-------|
| Inflammation degree   | None                                  | 0     |
|                       | Mild                                  | 1     |
|                       | Moderate                              | 2     |
|                       | Severe                                | 3     |
| Depth of inflammation | None                                  | 0     |
|                       | Mucosa                                | 1     |
|                       | Submucosa                             | 2     |
|                       | Transmural                            | 3     |
| Crypt destruction     | None                                  | 0     |
|                       | 1/3                                   | 1     |
|                       | 2/3                                   | 2     |
|                       | Loss of crypts only                   | 3     |
|                       | Loss of crypts and surface epithelium | 4     |
| Range of colon injury | 0                                     | 0     |
|                       | $\leq 1/4$                            | 1     |
|                       | $> 1/4$ and $\leq 1/2$                | 2     |
|                       | $> 1/2$ and $\leq 3/4$                | 3     |
|                       | $\geq 3/4$                            | 4     |
